# Supplementary material for: A novel gene cluster allows preferential utilization of fucosylated milk oligosaccharides in Bifidobacterium longum subsp. longum SC596
Source: PubMed Central journal article supplement (PMC5069460; doi:10.1038/srep35045), 2016-10-19

**A novel gene cluster allows preferential utilization of fucosylated milk oligosaccharides in *Bifidobacterium longum* subsp. *longum* SC596.**

Daniel Garrido<sup>2,4,6</sup>, Santiago Ruiz-Moyano<sup>2,4</sup>, Nina Kirmiz<sup>2,4</sup>, Jasmine C. C. Davis<sup>3,4</sup>, Sarah Totten<sup>3,4</sup>, Danielle G. Lemay<sup>4,5</sup>, Juan A. Ugalde<sup>7</sup>, J. Bruce German<sup>1,4</sup>, Carlito B. Lebrilla<sup>3,4</sup>, and David A. Mills<sup>1,2,4\*</sup>.

**SUPPLEMENTAL MATERIAL**

This article contains 9 Supplementary Tables and 6 Supplementary Figures.

**LEGEND TO SUPPLEMENTARY FIGURES**

**FIGURE S1:** Evolutionary relationship of *B. longum* strains in this study estimated by MLST analysis. The tree is drawn to scale, with branch lengths in the same units (number of base substitutions per site) as those of the evolutionary distances used to infer the phylogenetic tree. The evolutionary history was inferred using the Minimum Evolution method, followed by 1000 bootstrap replicates.

**FIGURE S2:** Growth of *B. longum* isolates on mMRS medium supplemented with A: 2% HMO; B: 2% LNT; C: 2% LNnT; D: 2% 3SL; E: 2% 6SL; F: 1% mucin. Growth was measured as OD of the media at 600 nm. Fermentations were carried out in triplicate; controls consisted of inoculated medium lacking of substrates and un-inoculated medium containing substrates which was also used as blank for OD measurements.

**FIGURE S3:** Principal component analysis (PCA) of the maximum optical density values (600 nm) of *B. longum* strains grown on HMO, LNT, LNnT, 2FL, 3FL, 3SL, 6SL and mucin. Negative control, *B. animalis* (red) and positive control *B. infantis* ATCC 15697 (green). Figure S3A represents variables (oligosaccharides substrates) and Figure S3B bifidobacteria strains.

**FIGURE S4:** Phylogenomic reconstruction based on 275 genes shared between all the studied *B. longum* genomes (total alignment of 202,423 nucleotides);

**FIGURE S5:** Venn diagram representing unique and shared genes between *B. longum* SC596 and DJO10A.

**FIGURE S6:** *B. longum* SC596 additional gene clusters related to HMO consumption. Colors are indicative of primary function of each respective gene, transcriptional regulators (black), oligosaccharide transport (blue) and carbohydrate feeder pathways (green).

**TABLE S1:** List of *Bifidobacterium* strains used in this study.

| Code      | Species                          | Additional strain information <sup>a</sup> | Source            |
|-----------|----------------------------------|--------------------------------------------|-------------------|
| SC91      | <i>B. longum subsp. longum</i>   | This study                                 | Infant feces      |
| SC116     | <i>B. longum subsp. longum</i>   | This study                                 | Infant feces      |
| SC156     | <i>B. longum subsp. longum</i>   | This study                                 | Infant feces      |
| SC215     | <i>B. longum subsp. longum</i>   | This study                                 | Infant feces      |
| SC249     | <i>B. longum subsp. longum</i>   | This study                                 | Infant feces      |
| SC280     | <i>B. longum subsp. longum</i>   | This study                                 | Infant feces      |
| SC513     | <i>B. longum subsp. longum</i>   | This study                                 | Infant feces      |
| SC536     | <i>B. longum subsp. longum</i>   | This study                                 | Infant feces      |
| SC558     | <i>B. longum subsp. longum</i>   | This study                                 | Infant feces      |
| SC592     | <i>B. longum subsp. longum</i>   | This study                                 | Infant feces      |
| SC596     | <i>B. longum subsp. longum</i>   | This study                                 | Infant feces      |
| SC618     | <i>B. longum subsp. longum</i>   | This study                                 | Infant feces      |
| SC630     | <i>B. longum subsp. longum</i>   | This study                                 | Infant feces      |
| SC657     | <i>B. longum subsp. longum</i>   | This study                                 | Infant feces      |
| SC662     | <i>B. longum subsp. longum</i>   | This study                                 | Infant feces      |
| SC697     | <i>B. longum subsp. longum</i>   | This study                                 | Infant feces      |
| DJO10A    | <i>B. longum subsp. longum</i>   | Gene bank: NC_010816                       | Adult feces       |
| KACC91563 | <i>B. longum subsp. longum</i>   | Gene bank: NC_017221                       | Neonate feces     |
| NCC2705   | <i>B. longum subsp. longum</i>   | Gene bank: NC_004307                       | Infant feces      |
| BBMN68    | <i>B. longum subsp. longum</i>   | Gene bank: NC_014656                       | Adult feces       |
| JCM1217   | <i>B. longum subsp. longum</i>   | ATCC15707; DSMZ20219                       | Adult feces       |
| 157F      | <i>B. longum subsp. longum</i>   | Gene bank: NC_015052                       | Infant feces      |
| F8        | <i>B. longum subsp. longum</i>   | Gene bank: NC_021008                       | Human feces       |
| BXY01     | <i>B. longum subsp. longum</i>   | Gene bank: CP008885                        | -                 |
| JDM301    | <i>B. longum subsp. longum</i>   | Gene bank: NC_014169                       | Probiotic product |
| ATCC15697 | <i>B. longum subsp. infantis</i> | JCM1222; DSMZ20088                         | Infant feces      |
| PRL2010   | <i>B. bifidum</i>                | Turroni et al. 2010                        | Infant feces      |
| JCM10602  | <i>B. animalis subsp. lactis</i> | DSMZ 10140                                 | Dairy product     |

<sup>a</sup>The original strain numbers are also noted, if known. JCM, Japan Collection of Microorganisms, ATCC, American Type Culture Collection; DSMZ, German Collection of Microorganisms and Cell Culture.

**Table S2:** Structures and masses of human milk oligosaccharides analyzed in this study.

| HMO type |                                    | Name                                     | Abbreviation of designation        | Mass (m/z)                                                                                 | Structure                                                                                                                                                                     | DP                                                                          |   |
|----------|------------------------------------|------------------------------------------|------------------------------------|--------------------------------------------------------------------------------------------|-------------------------------------------------------------------------------------------------------------------------------------------------------------------------------|-----------------------------------------------------------------------------|---|
| Neutral  | non fucosylated                    | Lacto- <i>N</i> -tetraose                | LNT                                | 709                                                                                        | Galβ1-4GlcNacβ1-3Galβ1-4Glc                                                                                                                                                   | 4                                                                           |   |
|          |                                    | Lacto- <i>N</i> -neotetraose             | LNnT                               | 709                                                                                        | Galβ1-4GlcNacβ1-3Galβ1-4Glc                                                                                                                                                   | 4                                                                           |   |
|          |                                    | Lacto- <i>N</i> -hexaose                 | LNH                                | 1074                                                                                       | Galβ1-3GlcNacβ1-3[Galβ1-4GlcNacβ1-6]Galβ1-4Glc                                                                                                                                | 6                                                                           |   |
|          |                                    | Lacto- <i>N</i> -neohexaose              | LNnH                               | 1074                                                                                       | Galβ1-4GlcNacβ1-3[Galβ1-4GlcNacβ1-6]Galβ1-4Glc                                                                                                                                | 6                                                                           |   |
|          |                                    | <i>para</i> -Lacto- <i>N</i> -hexaose    | p-LNH                              | 1074                                                                                       | Galβ1-3GlcNacβ1-3Galβ1-4GlcNacβ1-3Galβ1-4Glc                                                                                                                                  | 6                                                                           |   |
|          |                                    | 2'-Fucosyllactose                        | 2FL                                | 490                                                                                        | Fucα1-2Galβ1-4Glc                                                                                                                                                             | 3                                                                           |   |
|          | fucosylated                        | Lactodifucotetraose                      | LDFT                               | 636                                                                                        | Fucα1-2Galβ1-[Fucα1-3]4Glc                                                                                                                                                    | 4                                                                           |   |
|          |                                    | Lacto- <i>N</i> -fucopentaose            | LNFPI                              | 855                                                                                        | Fucα1-2Galβ1-3GlcNacβ1-3Galβ1-4Glc                                                                                                                                            | 5                                                                           |   |
|          |                                    |                                          | LNFPII                             | 855                                                                                        | Galβ1-3[Fucα1-4]GlcNacβ1-3Galβ1-4Glc                                                                                                                                          | 5                                                                           |   |
|          |                                    |                                          | LNFPIII                            | 855                                                                                        | Galβ1-3[Fucα1-3]GlcNacβ1-3Galβ1-4Glc                                                                                                                                          | 5                                                                           |   |
|          |                                    | Difucosyllacto- <i>N</i> -tetraose       | 3_1_2_0                            | 1074                                                                                       | Fucα1-2Galβ1-4[Fucα1-4]GlcNacβ1-3Galβ1-4Glc/<br>Galβ1-4[Fucα1-4]GlcNacβ1-3Galβ1-4[Fucα1-3]Glc                                                                                 | 6                                                                           |   |
|          |                                    | Monofucosyllacto- <i>N</i> -hexaose      | MFLNHI                             | 1221                                                                                       | Fucα1-2Galβ1-3GlcNacβ1-3[Galβ1-4GlcNacβ1-6]Galβ1-4Glc                                                                                                                         | 7                                                                           |   |
|          |                                    |                                          | MFLNHIII                           | 1221                                                                                       | Galβ1-3GlcNacβ1-3[Galβ1-4[Fucα1-3]GlcNacβ1-6]Galβ1-4Glc                                                                                                                       | 7                                                                           |   |
|          |                                    |                                          | 4120a                              | 1221                                                                                       | Galβ1-3[Fucα1-4]GlcNacβ1-3[Galβ1-4GlcNacβ1-6]Galβ1-4Glc                                                                                                                       | 7                                                                           |   |
|          |                                    | Monofucosylparalacto- <i>N</i> -hexaose  | IFLNH I                            | 1221                                                                                       | Fucα1-2Galβ1-4GlcNacβ1-3Galβ1-4GlcNacβ1-3Galβ1-4Glc                                                                                                                           | 7                                                                           |   |
|          |                                    |                                          | IFLNH III                          | 1221                                                                                       | Galβ1-4GlcNacβ1-3Galβ1-4[Fucα1-3]GlcNacβ1-3Galβ1-4Glc                                                                                                                         | 7                                                                           |   |
|          |                                    | Monofucosylparalacto- <i>N</i> -hexaose  | MFP LNHI V                         | 1221                                                                                       | Galβ1-3GlcNacβ1-3Galβ1-4[Fucα1-3]GlcNacβ1-3Galβ1-4Glc                                                                                                                         | 7                                                                           |   |
|          |                                    | Difucosyllacto- <i>N</i> -hexaose        | DFLNHa                             | 1366                                                                                       | Fucα1-2Galβ1-3GlcNacβ1-3[Galβ1-4[Fucα1-4]GlcNacβ1-6]Galβ1-4Glc                                                                                                                | 8                                                                           |   |
|          |                                    |                                          | Trifucosyllacto- <i>N</i> -hexaose | DFLNHb                                                                                     | 1366                                                                                                                                                                          | Galβ1-3[Fucα1-4]GlcNacβ1-3[Galβ1-4[Fucα1-3]GlcNacβ1-6]Galβ1-4Glc            | 8 |
|          |                                    |                                          |                                    | DFLNHc                                                                                     | 1366                                                                                                                                                                          | Fucα1-2Galβ1-3[Fucα1-4]GlcNacβ1-3[Galβ1-4GlcNacβ1-6]Galβ1-4Glc              | 8 |
|          |                                    |                                          |                                    | DFpLNHII                                                                                   | 1366                                                                                                                                                                          | Galβ1-3[Fucα1-4]GlcNacβ1-3Galβ1-4[Fucα1-3]GlcNacβ1-3Galβ1-4Glc              | 8 |
|          |                                    | Monofucosyllacto- <i>N</i> -octaose      | TFLNH                              | 1513                                                                                       | Fucα1-2Galβ1-3GlcNacβ1-3[Fucα1-2Galβ1-3GlcNacβ1-3Galβ1-4GlcNacβ1-6]Galβ1-4Glc                                                                                                 | 9                                                                           |   |
|          |                                    |                                          | Difucosyllacto- <i>N</i> -octaose  | 5130a                                                                                      | 1585                                                                                                                                                                          | Galβ1-3GlcNacβ1-3Gal[Galβ1-3GlcNacβ1-3Galβ1-4[Fucα1-3]GlcNacβ1-6]Galβ1-4Glc | 9 |
|          |                                    | 5130b                                    |                                    | 1585                                                                                       | Galβ1-3[Fucα1-4]GlcNacβ1-3Gal[Galβ1-4GlcNacβ1-3Galβ1-4GlcNacβ1-6]Galβ1-4Glc                                                                                                   | 9                                                                           |   |
|          |                                    | 5130c                                    |                                    | 1585                                                                                       | Fucα1-2Galβ1-3GlcNacβ1-3Gal[Galβ1-4GlcNacβ1-3Galβ1-4GlcNacβ1-6]Galβ1-4Glc                                                                                                     | 9                                                                           |   |
|          |                                    | F-LNO                                    |                                    | 1585                                                                                       | Galβ1-3GlcNacβ1-3Gal[Galβ1-4GlcNacβ1-3Galβ1-4[Fucα1-3]GlcNacβ1-6]Galβ1-4Glc                                                                                                   | 9                                                                           |   |
|          |                                    | Difucosyllacto- <i>N</i> -neooctaose     | DFLNO I                            | 1731                                                                                       | Galβ1-3GlcNacβ1-3Gal[Galβ1-4[Fucα1-3]GlcNacβ1-3Galβ1-4[Fucα1-3]GlcNacβ1-6]Galβ1-4Glc                                                                                          | 10                                                                          |   |
|          |                                    | Difucosyllacto- <i>N</i> -neooctaose     | DFLNnO I / DFLNO II                | 1731                                                                                       | Galβ1-4[Fucα1-3]GlcNacβ1-3Gal[Galβ1-3GlcNacβ1-3Galβ1-4[Fucα1-3]GlcNacβ1-6]Galβ1-4Glc                                                                                          | 10                                                                          |   |
|          |                                    |                                          | DFLNnO I / DFLNO II                | 1731                                                                                       | Galβ1-4GlcNacβ1-3Gal[Galβ1-3[Fucα1-4]GlcNacβ1-3Galβ1-4[Fucα1-3]GlcNacβ1-6]Galβ1-4Glc/<br>Galβ1-3[Fucα1-4]GlcNacβ1-3Gal[Galβ1-4GlcNacβ1-3Galβ1-4[Fucα1-3]GlcNacβ1-6]Galβ1-4Glc | 10                                                                          |   |
|          |                                    | Isomer Difucosyllacto- <i>N</i> -octaose | 5230a                              | 1731                                                                                       | Galβ1-3GlcNacβ1-3Gal[Fucα1-2Galβ1-3GlcNacβ1-3Galβ1-4[Fucα1-3]GlcNacβ1-6]Galβ1-4Glc                                                                                            | 10                                                                          |   |
|          | Difucosyllacto- <i>N</i> -octaose  |                                          |                                    |                                                                                            |                                                                                                                                                                               |                                                                             |   |
|          | Trifucosyllacto- <i>N</i> -octaose | 5330a                                    | 1877                               | Fucα1-2-Galβ1-3[Fucα1-4]GlcNacβ1-3Gal[Fucα1-2Galβ1-3GlcNacβ1-3Galβ1-4GlcNacβ1-6]Galβ1-4Glc | 11                                                                                                                                                                            |                                                                             |   |
| Acidic   | Sialylated                         | 3-Sialylactose                           | 3SL                                | 635                                                                                        | NeuAca2-3Galβ1-4Glc                                                                                                                                                           | 3                                                                           |   |
|          |                                    | Monosialyllacto- <i>N</i> -tetraose      | LSTa                               | 1000                                                                                       | NeuAca2-3Galβ1-3GlcNacβ1-3Galβ1-4Glc                                                                                                                                          | 5                                                                           |   |
|          |                                    | Monosialyllacto- <i>N</i> -neotetraose   | LSTc                               | 1000                                                                                       | NeuAca2-6Galβ1-4GlcNacβ1-3Galβ1-4Glc                                                                                                                                          | 5                                                                           |   |
|          |                                    | Monosialyllacto- <i>N</i> -hexaose       | S-LNH                              | 1365                                                                                       | Galβ1-3GlcNacβ1-3[[NeuAca2-6]Galβ1-4GlcNacβ1-6]Galβ1-4Glc                                                                                                                     | 5                                                                           |   |

|  |  |                                       |           |      |                                                                                                            |   |
|--|--|---------------------------------------|-----------|------|------------------------------------------------------------------------------------------------------------|---|
|  |  | Monosialyllacto- <i>N</i> -neohexaose | 4021a     | 1365 | Gal $\beta$ 1-3[NeuAc $\alpha$ 2-6]GlcNac $\beta$ 1-3[Gal $\beta$ 1-4GlcNac $\beta$ 1-6]Gal $\beta$ 1-4Glc | 5 |
|  |  |                                       | S-LNnHII  | 1365 | [NeuAc $\alpha$ 2-6]Gal $\beta$ 1-4GlcNac $\beta$ 1-3[Gal $\beta$ 1-4GlcNac $\beta$ 1-6]Gal $\beta$ 1-4Glc | 7 |
|  |  | unknown                               | 4_2_1_1.b | 1511 | Not defined                                                                                                | 8 |



|             |                                                        |    |    |    |    |    |   |    |    |    |    |    |    |    |    |    |    |   |    |    |    |
|-------------|--------------------------------------------------------|----|----|----|----|----|---|----|----|----|----|----|----|----|----|----|----|---|----|----|----|
| EC:3.2.1.89 | Arabinogalactan endo-beta-1,4-galactanase.             | 1  | 1  | 1  | 1  | 1  | 0 | 1  | 1  | 1  | 1  | 0  | 0  | 0  | 0  | 1  | 1  | 0 | 1  | 0  | 1  |
| EC:3.2.1.97 | Endo-alpha-N-acetylgalactosaminidase.                  | 1  | 1  | 1  | 1  | 1  | 1 | 1  | 1  | 1  | 1  | 0  | 1  | 1  | 1  | 0  | 0  | 1 | 0  | 1  | 1  |
| EC:3.2.1.99 | Arabinan endo-1,5-alpha-L-arabinosidase.               | 2  | 2  | 2  | 2  | 0  | 0 | 2  | 0  | 2  | 0  | 0  | 2  | 0  | 2  | 0  | 1  | 0 | 0  | 0  | 2  |
| COG1653     | ABC-type sugar transport system, periplasmic component | 11 | 12 | 12 | 11 | 12 | 9 | 14 | 12 | 10 | 12 | 20 | 12 | 11 | 11 | 20 | 15 | 9 | 20 | 14 | 17 |

**Table S4:** General features of RNA-seq experiments

| Sample List              | Number of reads | Counted fragments genes | Counted fragments intergenic | Uncounted fragments | % uncounted | % reads align genes | % Intergenic | %16S | %23S | %5S  |
|--------------------------|-----------------|-------------------------|------------------------------|---------------------|-------------|---------------------|--------------|------|------|------|
| LAC-A                    | 9888033         | 7594423                 | 1131340                      | 1162270             | 11.75       | 76.80               | 11.44        | 0.16 | 1.04 | 0.00 |
| LAC-B                    | 5654963         | 4243518                 | 696941                       | 714504              | 12.63       | 75.04               | 12.32        | 0.25 | 1.71 | 0.00 |
| HMOearly-A               | 7482193         | 5996053                 | 655133                       | 831007              | 11.11       | 80.14               | 8.76         | 0.27 | 0.78 | 0.00 |
| HMOearly-B               | 7575569         | 6010964                 | 652037                       | 912568              | 12.05       | 79.35               | 8.61         | 0.04 | 0.35 | 0.00 |
| HMOmid1-A                | 6234472         | 5003960                 | 515462                       | 715050              | 11.47       | 80.26               | 8.27         | 0.03 | 0.34 | 0.01 |
| HMOmid1-B                | 5394738         | 4293100                 | 471296                       | 630342              | 11.68       | 79.58               | 8.74         | 0.06 | 0.67 | 0.01 |
| HMOmid2-A                | 6428553         | 4826995                 | 599781                       | 1001777             | 15.58       | 75.09               | 9.33         | 0.11 | 1.15 | 0.00 |
| HMOmid2-B                | 5124926         | 4016256                 | 555846                       | 552824              | 10.79       | 78.37               | 10.85        | 0.42 | 4.21 | 0.00 |
| HMOlate-A                | 5611251         | 3963333                 | 912225                       | 735693              | 13.11       | 70.63               | 16.26        | 0.14 | 1.86 | 0.00 |
| HMOlate-B                | 4118311         | 3104249                 | 561952                       | 452110              | 10.98       | 75.38               | 13.65        | 0.03 | 0.42 | 0.00 |
| LNT-A                    | 8932952         | 6832417                 | 1192980                      | 907555              | 10.16       | 76.49               | 13.35        | 0.11 | 0.90 | 0.01 |
| LNT-B                    | 9145050         | 7230021                 | 1076957                      | 838072              | 9.16        | 79.06               | 11.78        | 0.02 | 0.70 | 0.01 |
| LNnT-A                   | 10064954        | 8377587                 | 834361                       | 853006              | 8.48        | 83.24               | 8.29         | 1.00 | 9.27 | 0.02 |
| LNnT-B                   | 12872241        | 10630312                | 1163154                      | 1078775             | 8.38        | 82.58               | 9.04         | 0.71 | 4.24 | 0.02 |
| 2FL-A                    | 8052846         | 5836574                 | 1172461                      | 1043811             | 12.96       | 72.48               | 14.56        | 0.03 | 1.46 | 0.00 |
| 2FL-B                    | 23080453        | 17134484                | 3079955                      | 2866014             | 12.42       | 74.24               | 13.34        | 0.04 | 1.89 | 0.01 |
| 3FL-A                    | 10734330        | 7607429                 | 1787026                      | 1339875             | 12.48       | 70.87               | 16.65        | 0.05 | 2.76 | 0.00 |
| 3FL-B                    | 17245753        | 12111408                | 2799942                      | 2334403             | 13.54       | 70.23               | 16.24        | 0.04 | 2.72 | 0.00 |
| Total reads              | 163641588       | 124813083               |                              |                     |             |                     |              |      |      |      |
| Average <i>B. longum</i> | 9091199         | 6934060                 | 1103269                      | 1053870             | 11.60       | 76.66               | 11.75        | 0.19 | 2.03 | 0.01 |
| SD                       | 4728266         | 3471806                 | 749151                       | 609837              | 1.81        | 3.98                | 2.95         | 0.27 | 2.17 | 0.01 |

<sup>a</sup>Total reads aligning to intergenic regions, identified in both genomes.

<sup>b</sup>Total reads not aligned to any genic or intergenic region.



**Table S5:** Transcriptomics of HMO utilization in *B. longum* SC596: Differentially regulated genes in *B. longum* SC596, relative to lactose

| Treatment | Number Differentially Expressed genes |
|-----------|---------------------------------------|
| 2'FL      | 1070                                  |
| 3'FL      | 1308                                  |
| LNT       | 1071                                  |
| LNnT      | 1299                                  |
| HMO Early | 1353                                  |
| HMO Mid1  | 1061                                  |
| HMO Mid2  | 1239                                  |
| HMO Late  | 1206                                  |

**Table S6:** Transcriptomics of HMO utilization in *B. longum* SC596: Enriched annotations in *B. longum* SC596 genes up-regulated relative to lactose

| Type | ANNOT_ID          | ANNOT_DESC                                                        | HMOe  | HMOm1 | HMOm2 | HMOI  | LNT   | LNnT  | 2FL | 3FL  |
|------|-------------------|-------------------------------------------------------------------|-------|-------|-------|-------|-------|-------|-----|------|
| COG  | COG3507           | Beta-xylosidase                                                   | NS    | NS    | 0.013 | NS    | NS    | NS    | NS  | NS   |
| COG  | COG1136           | ABC-type antimicrobial peptide transport system, ATPase component | NS    | NS    | NS    | NS    | 0.042 | NS    | NS  | NS   |
| KEGG | MAP00030          | Pentose phosphate pathway                                         | NS    | NS    | 0.008 | NS    | NS    | NS    | NS  | NS   |
| KEGG | MAP00970          | Aminoacyl-tRNA biosynthesis                                       | 0.003 | 0.061 | NS    | NS    | NS    | NS    | NS  | NS   |
| KEGG | MAP03010          | Ribosome                                                          | 0     | 0     | NS    | NS    | NS    | NS    | NS  | NS   |
| SRI  | TRNA-CHARGING-PWY | tRNA charging                                                     | 0     | NS    | NS    | NS    | NS    | NS    | 0   | 0    |
| SRI  | PWY-6717          | (1,4)-&beta;-xylan degradation                                    | 0.003 | NS    | 0.013 | 0.023 | NS    | NS    | NS  | 0.04 |
| GO   | GO:0008643        | carbohydrate transport                                            | NS    | NS    | NS    | 0.014 | NS    | NS    | NS  | NS   |
| GO   | GO:0006950        | response to stress                                                | NS    | NS    | NS    | 0.016 | NS    | NS    | NS  | NS   |
| GO   | GO:0005840        | ribosome                                                          | 0.001 | 0.001 | NS    | NS    | NS    | NS    | NS  | NS   |
| GO   | GO:0019843        | rRNA binding                                                      | 0     | 0.004 | NS    | NS    | NS    | 0.018 | NS  | NS   |

| Type | ANNOT_ID   | ANNOT_DESC                         | HMOe | HMOm1 | HMOm2 | HMOI | LNT | LNnT | 2FL | 3FL |
|------|------------|------------------------------------|------|-------|-------|------|-----|------|-----|-----|
| GO   | GO:0003735 | structural constituent of ribosome | 0    | 0     | NS    | NS   | NS  | NS   | NS  | NS  |
| GO   | GO:0006200 | ATP catabolic process              | NS   | 0.005 | NS    | NS   | NS  | NS   | NS  | NS  |
| GO   | GO:0006412 | translation                        | 0    | 0.001 | NS    | NS   | NS  | NS   | NS  | NS  |
| GO   | GO:0005524 | ATP binding                        | NS   | 0.047 | NS    | NS   | NS  | NS   | NS  | NS  |

**Table S7:** Transcriptomics of HMO utilization in *B. longum* SC596: Enriched annotations in *B. longum* down-regulated relative to lactose

| TYP<br>E | ANNOT_I<br>D | ANNOT_DES<br>C             | HMO<br>e | HMOm<br>1 | HMOm<br>2 | HMO<br>I | LN<br>T | LNn<br>T | 2F<br>L | 3F<br>L |
|----------|--------------|----------------------------|----------|-----------|-----------|----------|---------|----------|---------|---------|
| COG      | COG1609      | Transcriptional regulators | 0.003    | NS        | NS        | NS       | 0.017   | NS       | NS      | NS      |
| SRI      | PWY0-781     | aspartate superpathway     | NS       | NS        | NS        | NS       | 0.028   | NS       | NS      | NS      |

The table lists p-values that are adjusted for multiple hypothesis testing. Green highlight (adjusted  $p \leq 0.05$ ) is significant, “NS” is non-significant, and others are marginally significant (unadjusted  $p \leq 0.05$ ). Only terms with at least one significant condition are listed.

**Table S8:** Putative genes associated to HMO consumption in *B. longum* SC596 (Related to Figure 5).

| Feature ID | Gene  | Gene description                                                                             |
|------------|-------|----------------------------------------------------------------------------------------------|
| BLNG_00936 | 984   | ABC-type sugar transport system, periplasmic component                                       |
| BLNG_00160 | 1.317 | ABC-type sugar transport system, periplasmic component                                       |
| BLNG_01262 | 438   | Fucose dissimilation pathway protein FucU( EC:5.1.3.- )                                      |
| BLNG_01258 | 1.278 | L-alanine-DL-glutamate epimerase and related enzymes of enolase superfamily                  |
| BLNG_01263 | 1.437 | Alpha-L-fucosidase( EC:3.2.1.51 )                                                            |
| BLNG_01259 | 792   | Dehydrogenases with different specificities (related to short-chain alcohol dehydrogenases)( |
| BLNG_01260 | 822   | Predicted metal-dependent hydrolase of the TIM-barrel fold                                   |
| BLNG_01261 | 897   | Dihydrodipicolinate synthase/N-acetylneuraminate lyase( EC:4.2.1.52 )                        |
| BLNG_01264 | 2.352 | hypothetical protein                                                                         |
| BLNG_01257 | 1.383 | ABC-type sugar transport system, periplasmic component                                       |
| BLNG_01255 | 876   | ABC-type sugar transport systems, permease components                                        |
| BLNG_01256 | 978   | ABC-type sugar transport system, permease component                                          |
| BLNG_00014 | 1.488 | sugar (Glycoside-Pentoside-Hexuronide) transporter                                           |
| BLNG_00196 | 1.014 | UDP-glucose-4-epimerase( EC:5.1.3.2 )                                                        |
| BLNG_01135 | 1.251 | galactose-1-phosphate uridylyltransferase, family 1( EC:2.7.7.12 )                           |
| BLNG_01136 | 1.251 | galactokinase( EC:2.7.1.6 )                                                                  |
| BLNG_00166 | 1.023 | UDP-glucose-4-epimerase( EC:5.1.3.2 )                                                        |
| BLNG_01475 | 1.677 | phosphoglucomutase, alpha-D-glucose phosphate-specific( EC:5.4.2.2 )                         |
| BLNG_01345 | 1.128 | ABC-type sugar transport systems, ATPase components                                          |
| BLNG_00935 | 1.542 | ABC-type sugar transport system, ATPase component( EC:3.6.3.17 )                             |
| BLNG_00933 | 1.023 | Ribose/xylose/arabinose/galactoside ABC-type transport systems, permease components          |
| BLNG_00934 | 1.071 | Ribose/xylose/arabinose/galactoside ABC-type transport systems, permease components          |
| BLNG_00460 | 915   | Transcriptional regulator/sugar kinase( EC:2.7.1.2 )                                         |
| BLNG_00163 | 2.256 | 1,3-beta-galactosyl-N-acetylhexosamine phosphorylase                                         |
| BLNG_00164 | 1.080 | Putative homoserine kinase type II (protein kinase fold)                                     |
| BLNG_00165 | 1.548 | Galactose-1-phosphate uridylyltransferase( EC:2.7.7.12 )                                     |
| BLNG_00457 | 1.284 | N-acetylglucosamine-6-phosphate deacetylase( EC:3.5.1.25 )                                   |
| BLNG_00458 | 813   | glucosamine-6-phosphate isomerase( EC:3.5.99.6 )                                             |
| BLNG_00161 | 972   | ABC-type sugar transport systems, permease components                                        |
| BLNG_00162 | 951   | ABC-type sugar transport system, permease component                                          |
| BLNG_00911 | 2.136 | N-acetyl-beta-hexosaminidase                                                                 |
| BLNG_00459 | 1.125 | Transcriptional regulator/sugar kinase                                                       |
| BLNG_01753 | 2.076 | Beta-galactosidase( EC:3.2.1.23 )                                                            |

**Table S9:** MLST genes and primers used in this study.

| Gene        | PCR primer (5'-3') <sup>*,a</sup>                                  | Expected Amplicon size (bp) | Anneling Temp. (°C) |
|-------------|--------------------------------------------------------------------|-----------------------------|---------------------|
| <i>clpC</i> | GAG TAC CGC AAG TAC ATC GAG<br>CAT CCT CAT CGT CGA ACA GGA AC      | 748                         | 63                  |
| <i>purF</i> | CAT TCG AAC TCC GAC ACC GA<br>GTG GGG TAG TCG CCG TTG              | 977                         | 62                  |
| <i>gyrB</i> | AGC TGC ACG CBG GCG GCA AGT TCG<br>GTT GCC GAG CTT GGT CTT GGT CTG | 811                         | 66                  |
| <i>fusA</i> | ATC GGC ATC ATG GCY CAC ATY GAT<br>CCA GCA TCG GCT GMA CRC CCT T   | 784                         | 66                  |
| <i>Iles</i> | ATC CCG CGY TAC CAG ACS ATG<br>CGG TGT CGA CGT AGT CGG CG          | 789                         | 66                  |
| <i>rplB</i> | GGA CAA GGA CGG CRT SCC SGC CAA<br>ACG ACC RCC GTG CGG GTG RTC GAC | 498                         | 67                  |
| <i>rpoB</i> | GGC GAG CTG ATC CAG AAC CA<br>GCA TCC TCG TAG TTG TAS CC           | 1057                        | 62                  |

\*= Upper sequence, forward primer; Lower sequence, reverse primer.

<sup>a</sup> In the primer sequence R indicates (A/G), S (C/G), Y (C/T).

#### SBP primers used for cloning (5'-3')

BlnG\_00160F TTTGTACAAAAAAGCCGGCGACACGAAGTCCGGCAG  
 BlnG\_00160R TTTGTACAAGAACTCCTTGACGGACAGACCGAGGT  
 BlnG\_00936F TTTGTACAAAAAAGGTGGCAGCTCGGACTCCGGCAAG  
 BlnG\_00936R TTTGTACAAGAAAGTAGGCGCGGGTGTGTTGTCC  
 BlnG\_01257F TTGTACAAAAAAGAGCGATGTGACCGCGCAGGAC  
 BlnG\_01257R TTTGTACAAGAAAGTCAGCGTCGGTGGTGACCTTGAA

#### Glycosyl hydrolases primers used for cloning (5'-3')

BlnG\_00015F TTTGTACAAAAAAGCAGGCACCATGACAGACGTCACACATGTCCG  
 BlnG\_00015R TTTGTACAAGAAAGCTGGGTTGATCAGCTCGAGGTCGACATCG  
 BlnG\_01753F TTTGTACAAAAAAGCAGGCACCATGGAACGTAAGAGTTCAAGT  
 BlnG\_01753R TTTGTACAAGAAAGCTGGGTTTATCCGCACCGCAGCCGCACGG  
 BlnG\_01263F TTTGTACAAAAAAGCAGGCACCATGAGCAATCCAACAAATGATG  
 BlnG\_01263R TTTGTACAAGAAAGCTGGGTTTATCCGCACCGCAGCCGCACGG  
 BlnG\_01264F TTTGTACAAAAAAGCAGGCACCATGAAACTCACATTCGATGGAA  
 BlnG\_01264R TTTGTACAAGAAAGCTGGGTTACGCCGGATGGTTCCTTGAAT



Figure S1

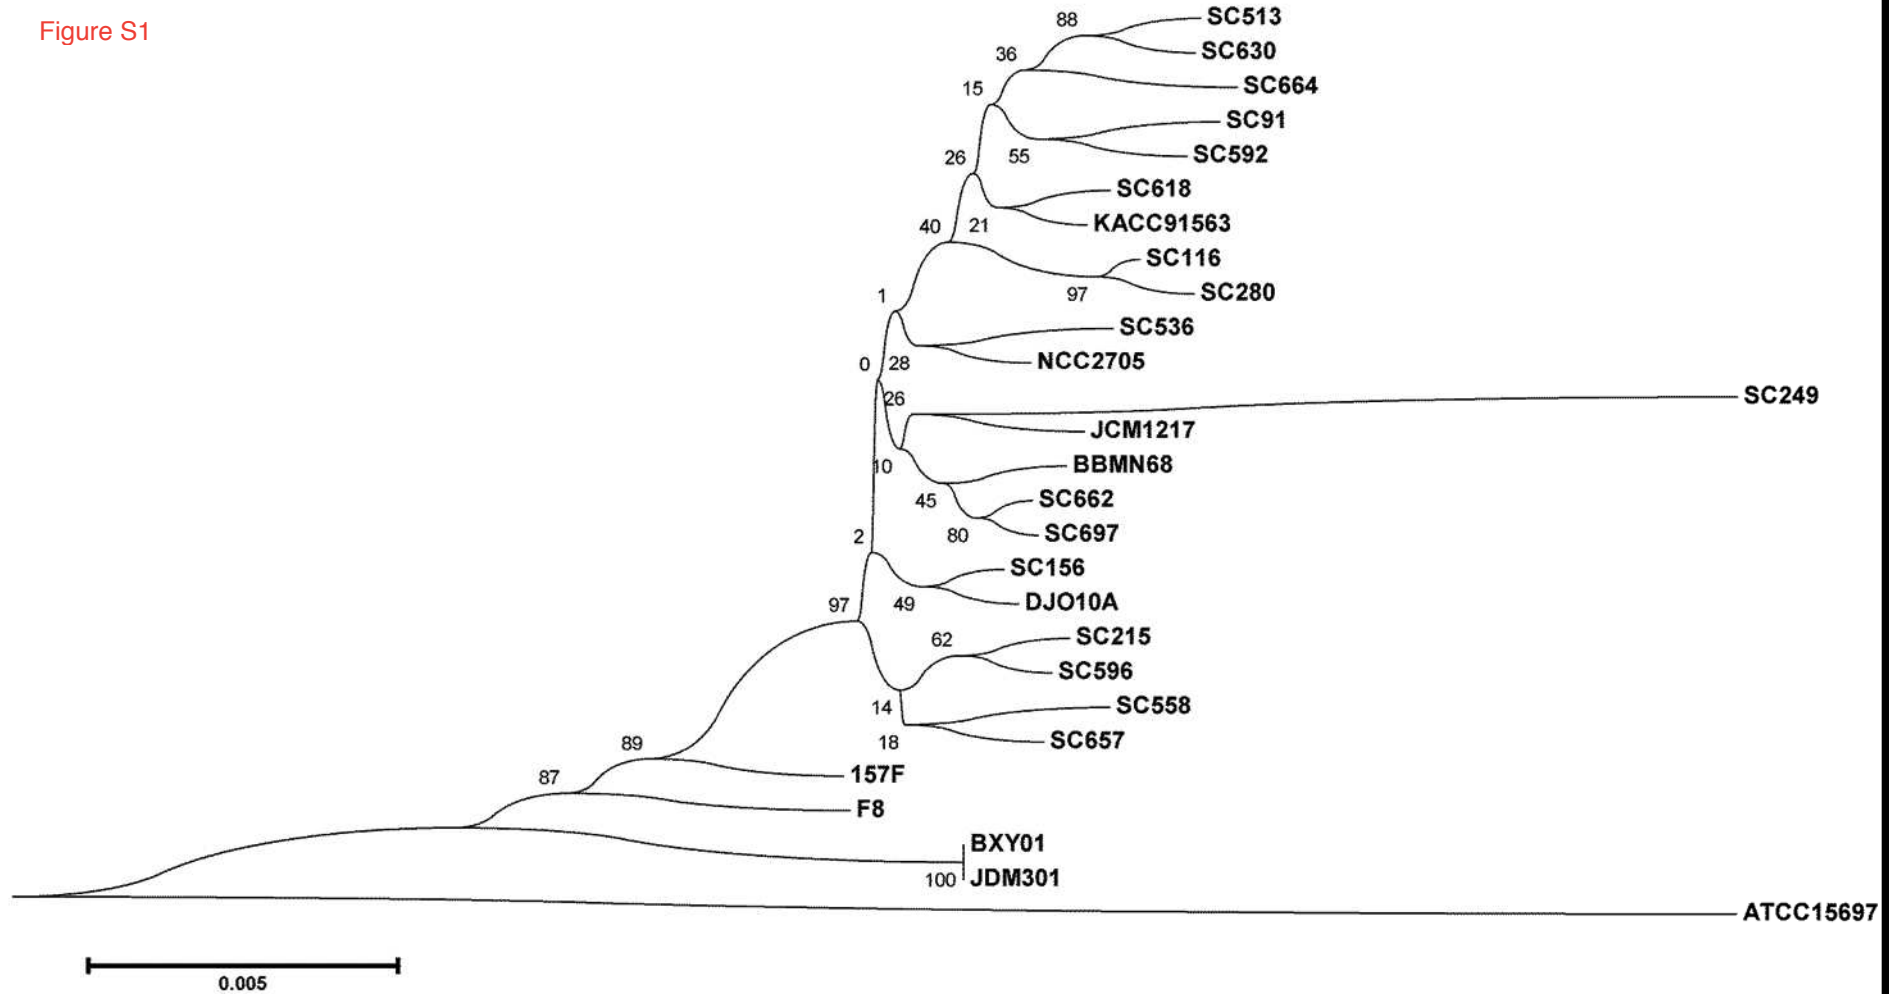

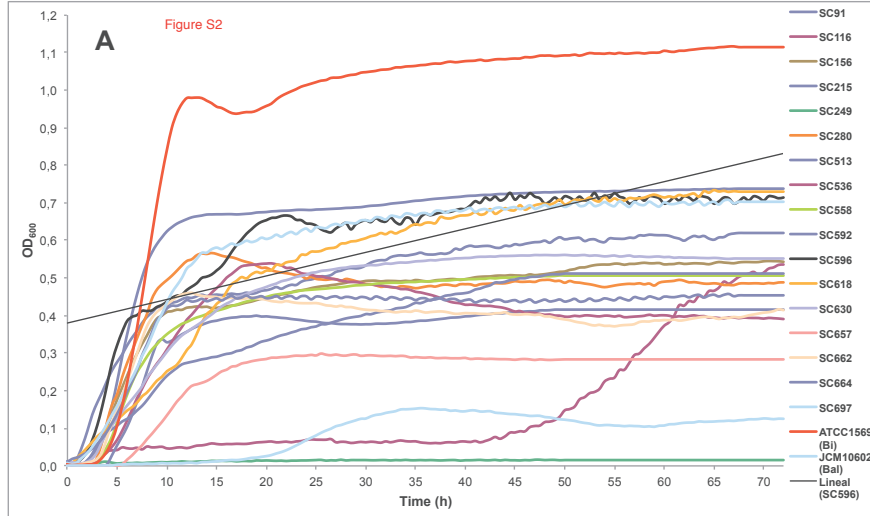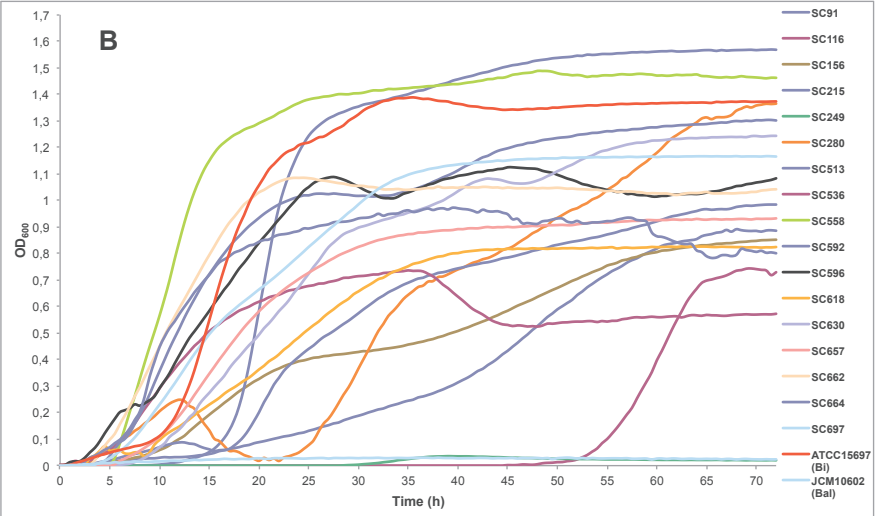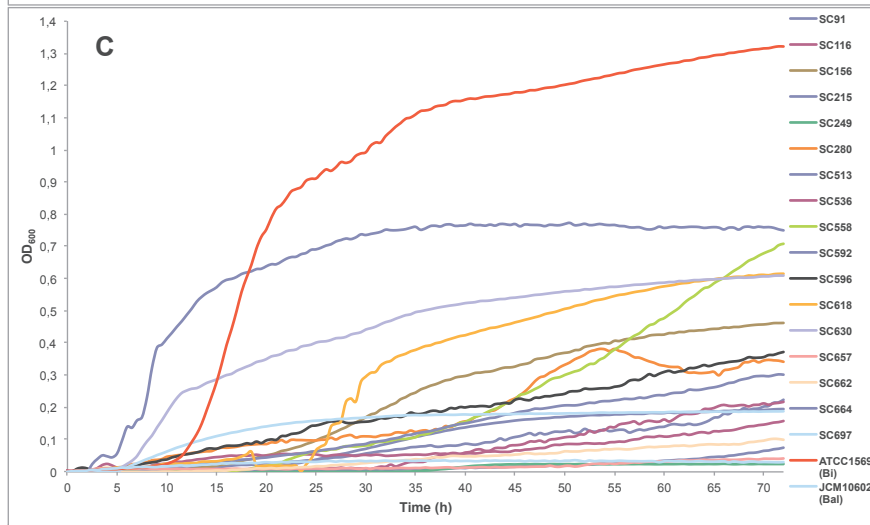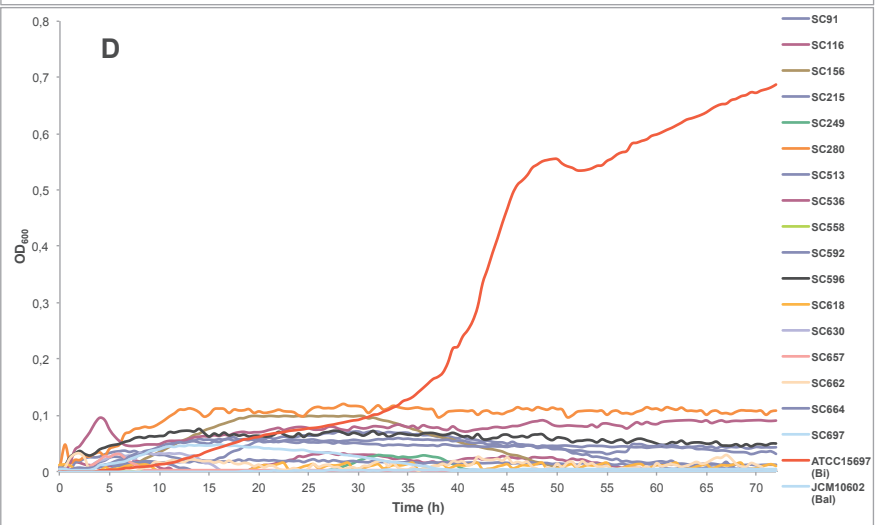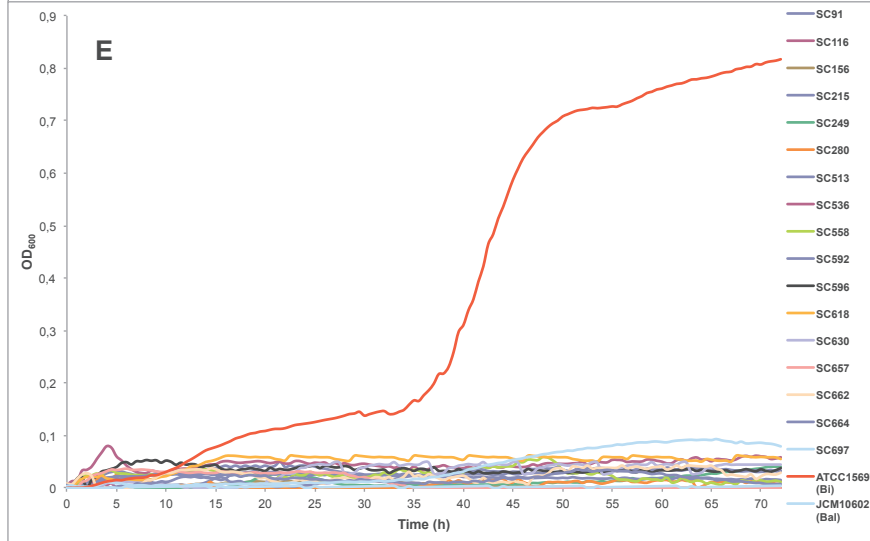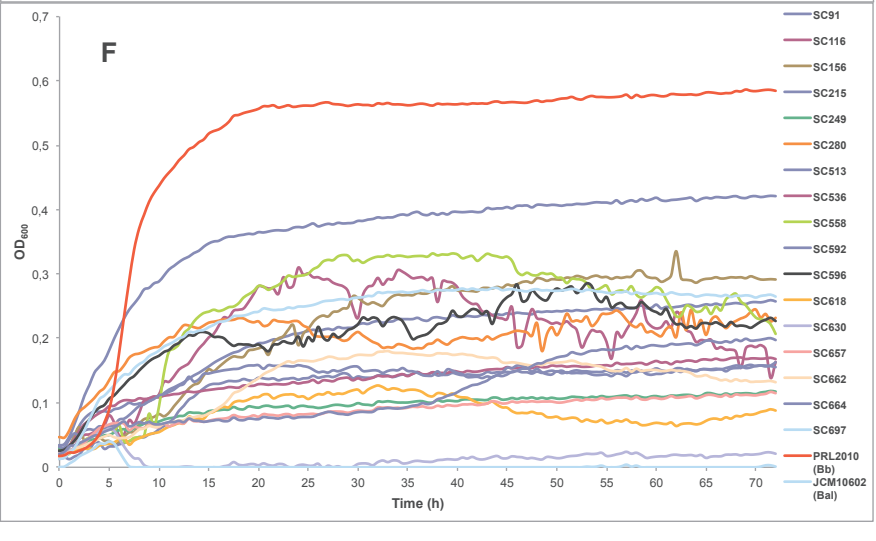

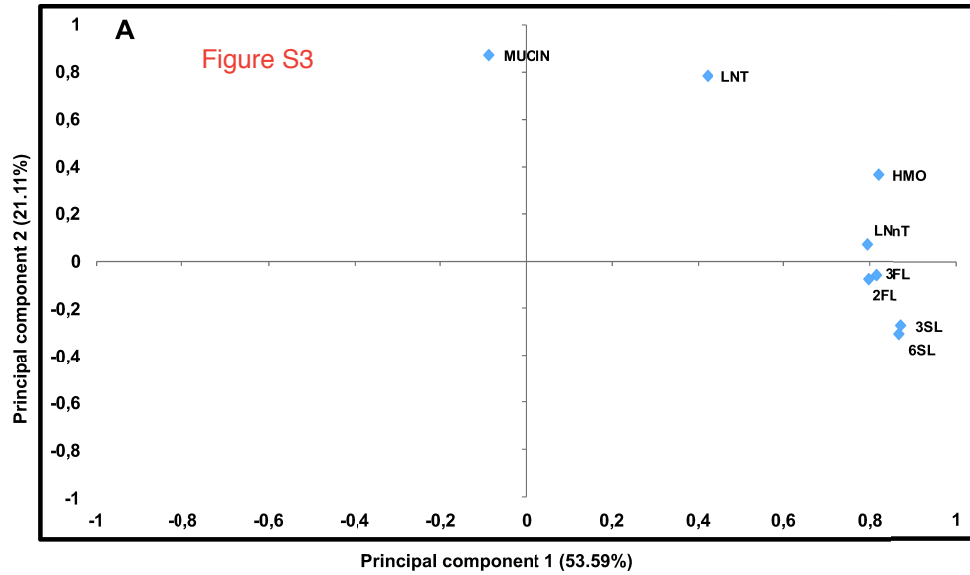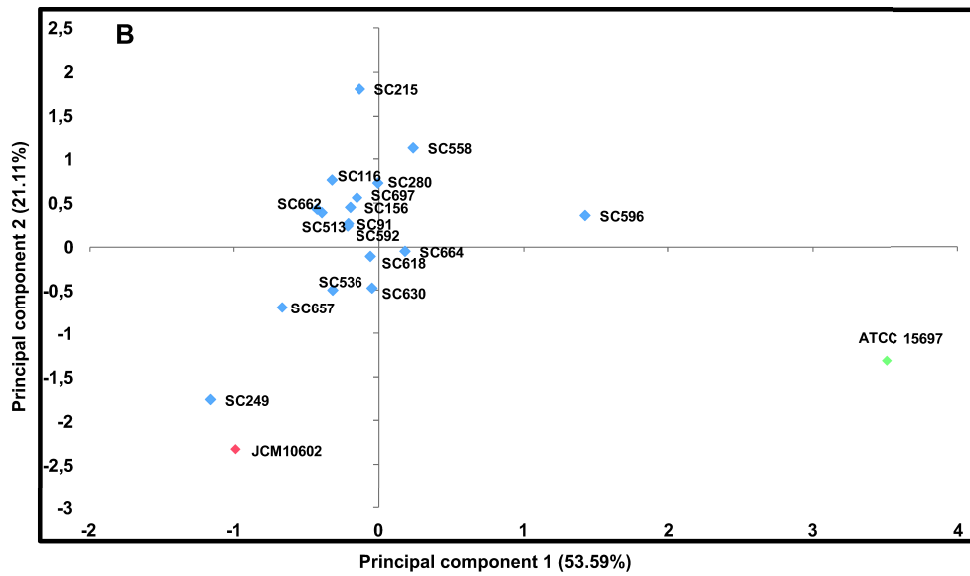



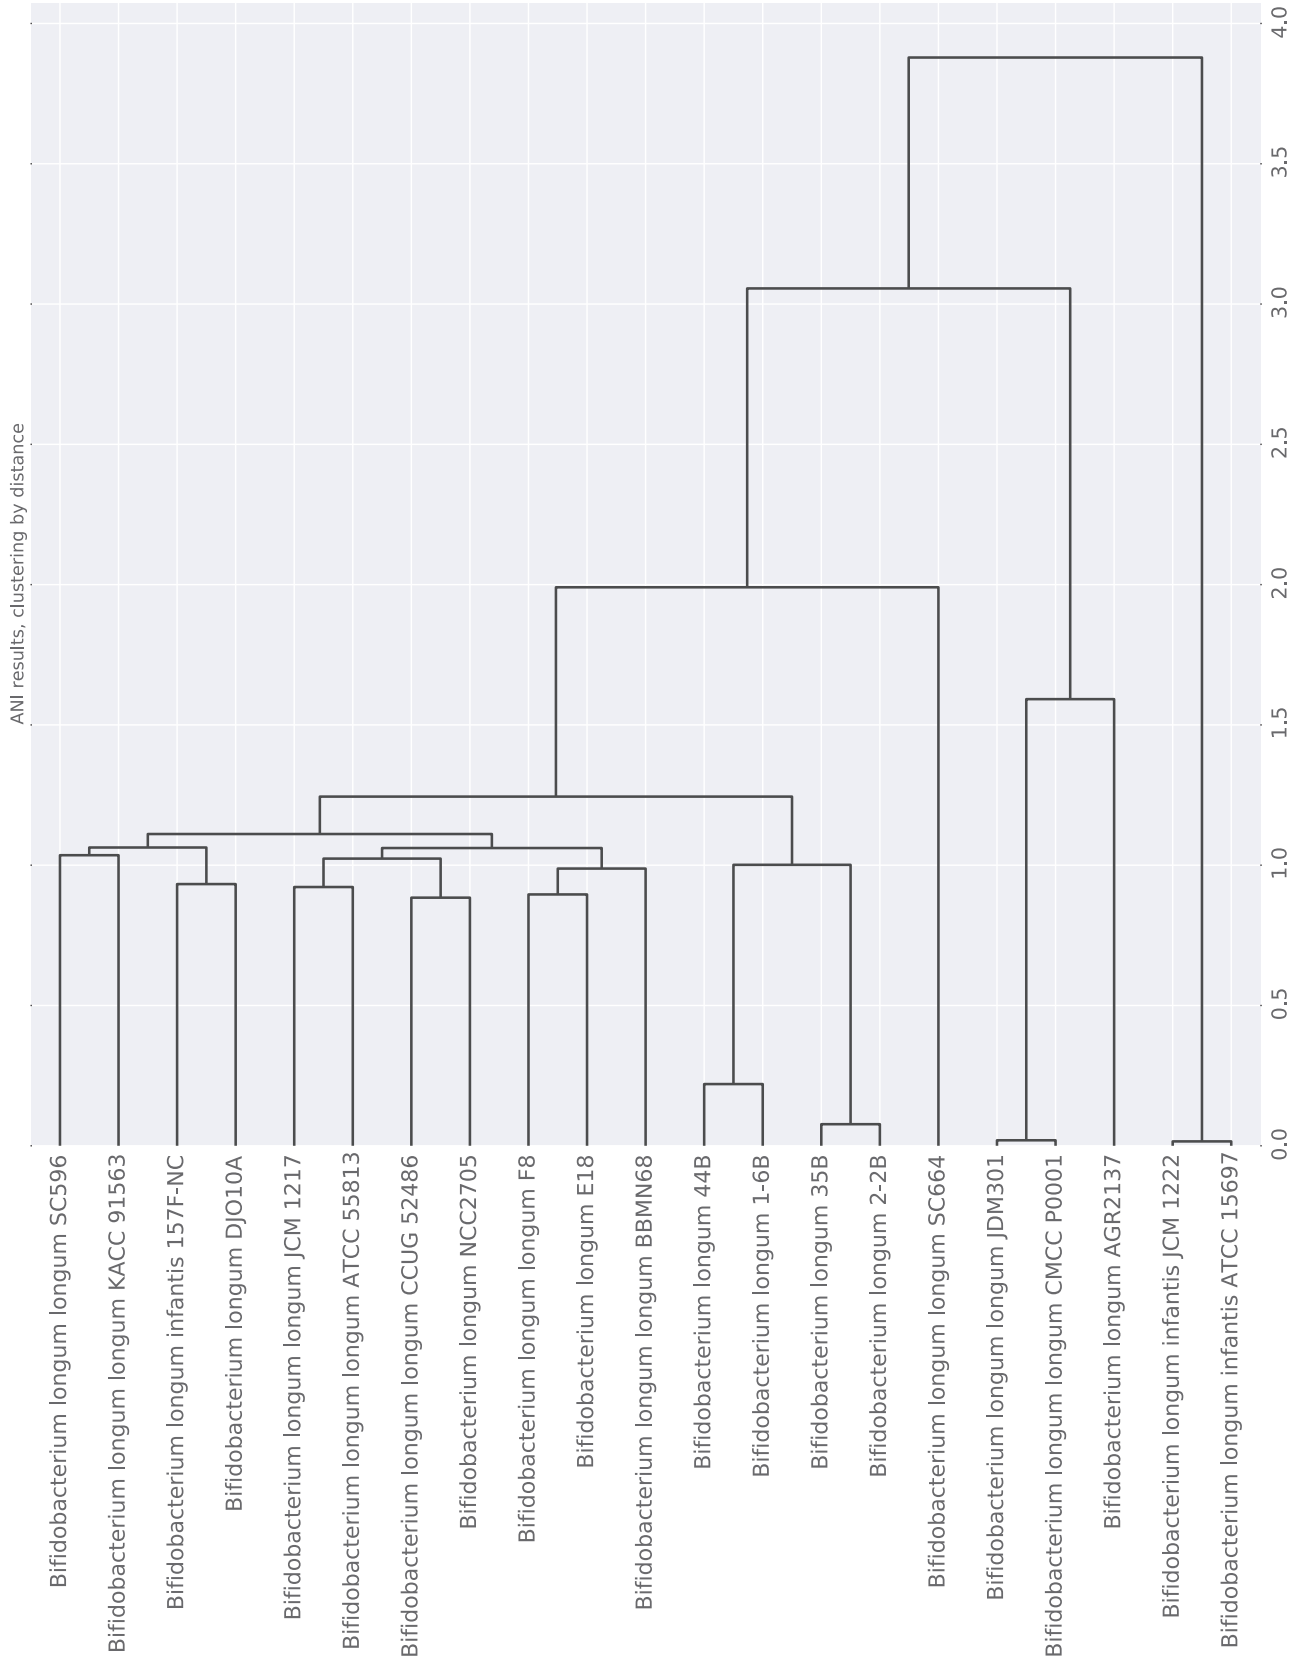

Figure S5

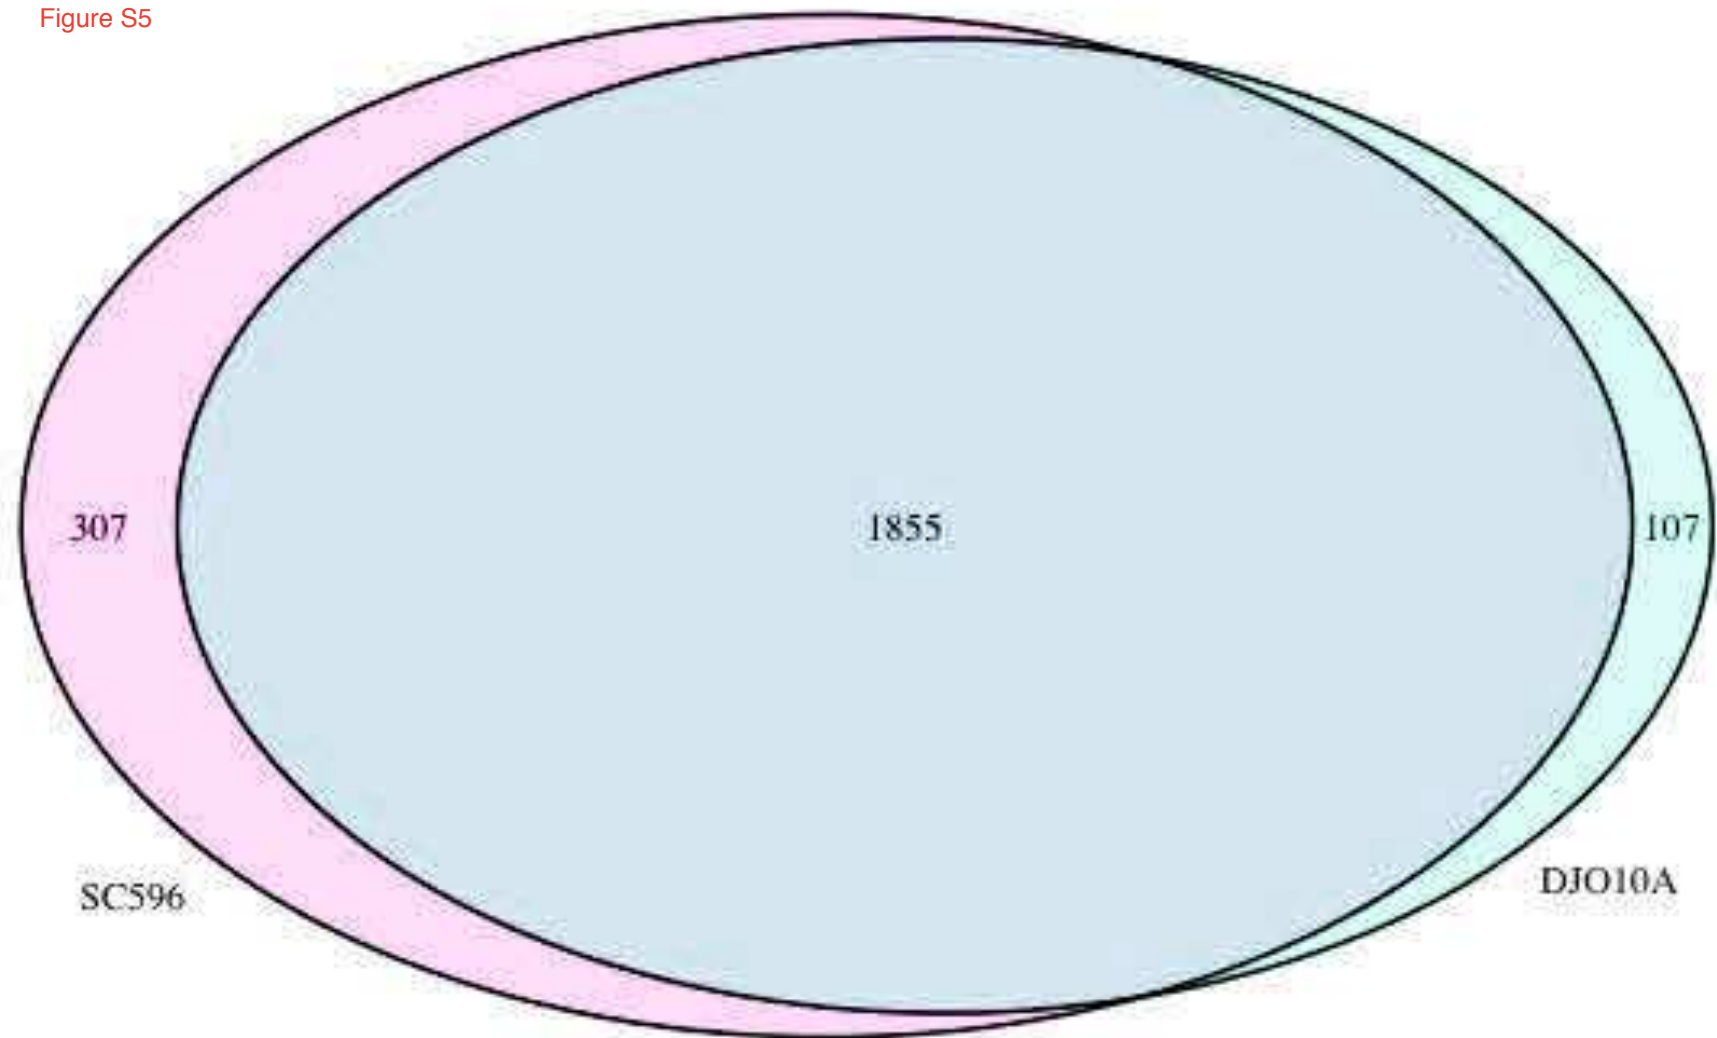

## LNB/GNB cluster

Figure S6

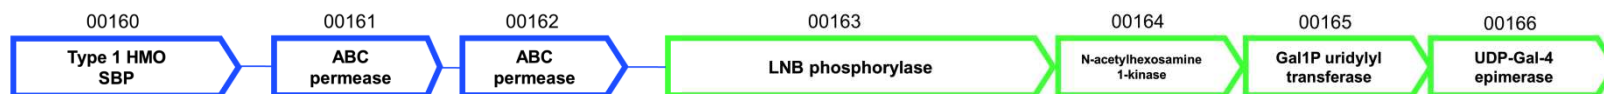

## LNB/GNB cluster 2

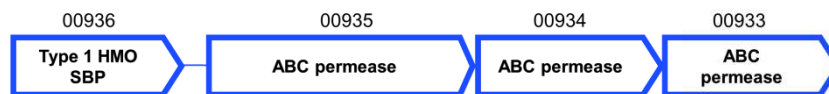

## GlcNAc utilization cluster

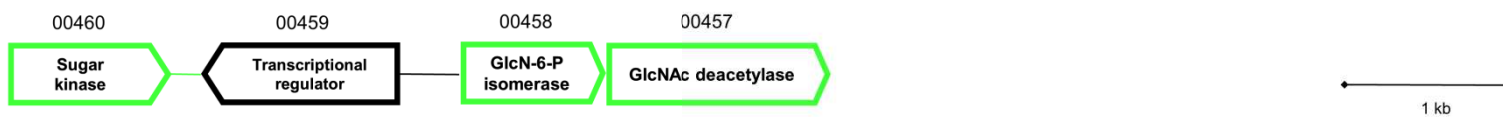

Supplement: srep35045-s1.pdf [file srep35045-s1.pdf]
